# Supplementary material
Source: PubMed Central journal article supplement (PMC2830843)

Fig. S1a

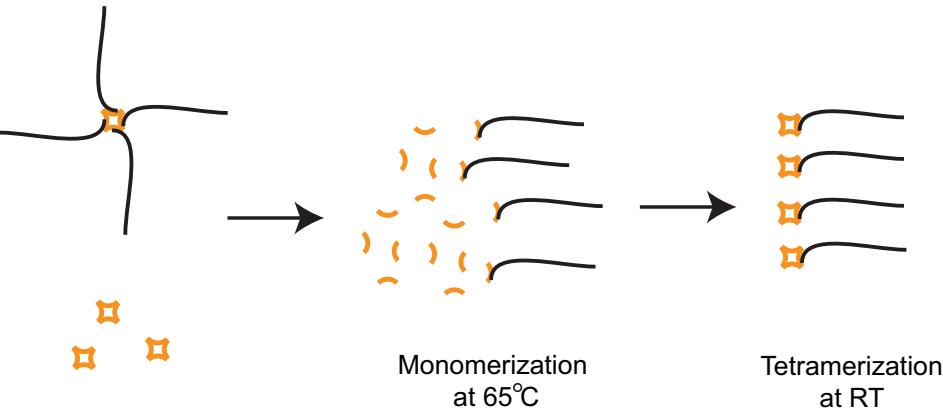

Supplement: supp_M900248-MCP200_FigS1a.pdf [file supp_M900248-MCP200_FigS1a.pdf]

Fig. S1b

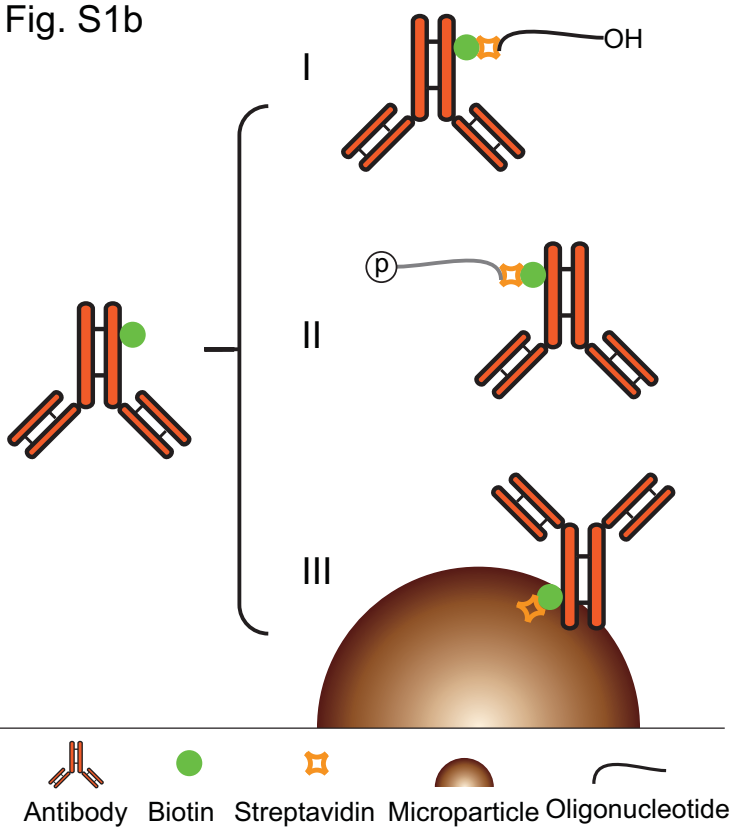

Supplement: supp_M900248-MCP200_FigS1b.pdf [file supp_M900248-MCP200_FigS1b.pdf]
